1

2

3

4

Testing the effect of oxytocin on social grooming in bonobos

5

6

James Brooks<sup>1,2\*</sup>, Fumihiko Kano<sup>2,3,4\*</sup>, Hanling Yeow<sup>1,2</sup>, Naruki Morimura<sup>1,2</sup>, Shinya Yamamoto<sup>1,5</sup>

7

<sup>1</sup>Wildlife Research Center, Kyoto University

8

<sup>2</sup>Kumamoto Sanctuary, Kyoto University

9

<sup>3</sup>Center for the Advanced Study of Collective Behaviour, University of Konstanz

10

<sup>4</sup>Max-Planck Institute of Animal Behavior

11

<sup>5</sup>Kyoto University Institute for Advanced Study, Kyoto University

12

\*Co-first authors

13

14

Correspondence to: James Brooks

15

Email: [jamesgerardbrooks@gmail.com](mailto:jamesgerardbrooks@gmail.com) (JB)

16

Address: 990, Otao, Misumi, Uki City, Kumamoto Prefecture, 8693201, Japan

17

18 Abstract:

19 Oxytocin has attracted research attention due to its role in promoting social bonding. In bonobos  
20 and chimpanzees, the two *Pan* species closely related to humans, urinary oxytocin is known to  
21 correlate with key behaviours related to social bonding, such as social grooming in chimpanzees  
22 and female-female sexual behaviour in bonobos. However, no study has demonstrated that the  
23 administration of oxytocin promotes real-life social interactions in *Pan*, leaving it unclear whether  
24 oxytocin is merely correlated with social behaviors or does affect them in these species. To test  
25 this, we administered nebulized oxytocin or saline placebo to a group of female bonobos and  
26 subsequently observed the change in their gross behavior during free interaction. We found an  
27 overall effect of more frequent grooming in the oxytocin condition. However, on the individual  
28 level this effect remained significant for only one participant in our follow-up models, suggesting  
29 future work should explore inter-individual variation. Our results provide some experimental  
30 support for the biobehavioural feedback loop hypothesis, which posits that some functions of the  
31 oxytocin system support the formation and maintenance of social bonds through a positive  
32 feedback loop; however, further tests with a larger number of individuals are required. Our results,  
33 at a minimum, demonstrated that oxytocin affects spontaneous, naturalistic social interactions of  
34 at least some female bonobos, adding to accumulating evidence that oxytocin modulates complex  
35 social behaviors of *Pan*.

36 Keywords: Oxytocin, bonobos, social bonding, biobehavioural feedback loop, social grooming, *Pan*  
37 *paniscus*

38

39 Introduction:

40 Oxytocin is a hormone neuropeptide conserved through mammalian evolution and plays diverse  
41 roles in regulating social behaviors across species. Among non-human great apes, the majority of  
42 studies have been conducted through measurement of urinary oxytocin following key social  
43 behaviours. Crockford et al. [1] showed that urinary oxytocin levels in wild chimpanzees increase  
44 following social grooming, a key socio-positive behavior widely present in nonhuman primates,  
45 and proposed that a positive feedback loop through oxytocin may have evolved to support social  
46 bonding in this species. Relatedly, Moscovice et al. [2] found that urinary oxytocin levels in wild  
47 female bonobos increased following same-sex sexual behaviour, genito-genital (GG) rubbing.  
48 Bonobos also increased proximity and coalitionary support among females after GG-rubbing;  
49 though it remains unclear if oxytocin played a direct role in these behavioural changes. Other  
50 studies have additionally demonstrated that urinary oxytocin in chimpanzees rises after food  
51 sharing [3], reconciliation [4], border patrols [5,6], and group hunting [5,7], further suggesting its  
52 importance to social bonds and coordination.

53 In several primate species, studies have demonstrated exogenous oxytocin can impact a  
54 wide range of social behaviours (reviewed in [8]). In macaques, several studies have demonstrated  
55 that oxytocin alters social gaze, such as increased attention to eyes [9], reduced attention to  
56 negative and fearful facial expressions [10] as well as social threats [11], and more gaze following  
57 [12]. In one of the first to test the effect of oxytocin in spontaneous social behaviour among  
58 multiple macaques, although still confined to primate chairs in a laboratory setting, Jiang and Platt  
59 [13] found evidence that oxytocin flattened the dominance hierarchy and enhanced synchrony of  
60 mutual gaze. Marmosets similarly showed an increase in attention to eyes [14] following oxytocin

61 administration and an increase in anxiety and vigilance following administration of an oxytocin  
62 antagonist [15]. Another study found that oxytocin promoted huddling in marmosets, while an  
63 oxytocin antagonist reduced social proximity and huddling [16]. On the other hand, in capuchin  
64 monkeys oxytocin was found to reduce food sharing through increasing interindividual distance  
65 [17]; the authors interpreted these results as derived from oxytocin's anxiolytic effect, which  
66 increased social distance and thereby decreased opportunities for food sharing [17].

67         The results of three studies measuring behaviour following oxytocin administration in non-  
68 human great apes were mixed. Proctor et al. [18] administered oxytocin to eight chimpanzees  
69 individually for one trial each in both saline and oxytocin conditions then observed them in their  
70 regular social groups. Although they did not find significant effects for any behaviours measured,  
71 the authors note that it may be due to methodological issues, such as in establishing an effective  
72 dose of oxytocin for chimpanzees or influence from groupmates who did not receive oxytocin  
73 before social interaction. Hall et al. [19] similarly found no effect of oxytocin when chimpanzee  
74 dyads were administered oxytocin or saline placebo and subsequently tested in a token exchange  
75 task. Each participant chose one of two tokens to exchange and received rewards based on the  
76 choice of both participants in distributions based on games such as the prisoner's dilemma and  
77 hawk-dove. However, although this study administered oxytocin to a dyad, the authors reported  
78 the same methodological concerns for the oxytocin administration procedure as well as a  
79 confound between experimental condition and order. No clear patterns emerged in either the  
80 placebo or oxytocin conditions, limiting interpretation of oxytocin's possible effect. On the  
81 contrary to these studies reporting null results, Brooks et al. [20] found that oxytocin enhanced  
82 species-typical social gaze, increasing eye contact in bonobos but not chimpanzees, indicating that

83 oxytocin can modulate gaze behaviour. While the species difference in Brooks et al. cannot be  
84 attributed to differences in oxytocin administration procedure, it remains unclear whether the lack  
85 of effect in Proctor et al. and Hall et al. is due to methodology of oxytocin administration or that  
86 exogenous oxytocin fails to significantly affect chimpanzee real-life social interaction.

87 Therefore, currently there is no study demonstrating that the administration of oxytocin  
88 affects spontaneous social interactions of nonhuman great apes, leaving it unclear whether  
89 oxytocin does cause any change in key social behaviors of great apes or just is correlated with  
90 those behaviors. Moreover, the biobehavioural feedback loop hypothesis suggests that an  
91 oxytocin positive feedback loop has evolved to support *Pan* social bonding [1]. Although it is  
92 central to this hypothesis that both socio-positive interactions cause oxytocin release and that  
93 oxytocin can lead to socio-positive interactions, there is no direct evidence showing that oxytocin  
94 promotes any socio-positive interaction in *Pan*.

95 Given recent progresses in this line of research, it is worthwhile to test whether oxytocin  
96 promotes key social behaviours related to social bonding in *Pan* using the updated methods of  
97 oxytocin administration. While previous studies with chimpanzees administered oxytocin to one  
98 individual or a dyad at a time, and subsequently observed the social interaction between this  
99 individual and group mates, we were able to administer oxytocin to whole subgroups of female  
100 bonobos simultaneously. For practical reasons, we could only test bonobos (not chimpanzees) in  
101 this study design, though similar future work on chimpanzees will also be necessary. In this study,  
102 we administered nebulized oxytocin or saline placebo to female bonobos following the methods  
103 employed in Brooks et al. [20] and subsequently observed the change in their gross interactive

104 behavior, including grooming and GG-rubbing, as well as other noninteractive behaviours during

105 their free interaction.

106

107 Methods:

108 Ethics statement:

109 All bonobo participants received regular feedings, daily enrichment, and had ad libitum access to  
110 water. No change was made to their daily care routine for the purpose of this study. Apes were  
111 never restrained at any point. We carefully considered the safety of the oxytocin administration as  
112 in previous studies. Again, we based this decision on the fact that 1) oxytocin is often administered  
113 to human children and adults, 2) oxytocin is active for only a short period of time following  
114 administration, 3) oxytocin is naturally produced in bonobos and chimpanzees following relevant  
115 behaviors [1,2] , and 4) no previous studies administering oxytocin intranasally to chimpanzees or  
116 bonobos reported any agonistic interaction [18–20]. All female bonobos were taking birth control  
117 (details can be found in supplementary material) and thus no bonobos were pregnant at any time  
118 during the course of this experiment. Ethical approval number was WRC-2020-KS014A. This study  
119 complied with the American Society of Primatologists Principles for the Ethical Treatment of Non-  
120 Human Primates, as well as all applicable laws in the country where it was conducted.

121

122 Participants:

123 Four adult female bonobos at Kumamoto Sanctuary participated in this research. Details about  
124 participant ages and rearing histories can be found in supplementary material (Table S1). Animals  
125 were not food or water deprived at any time and were given both physical and social  
126 environmental enrichment in their daily life. The bonobos live in a dynamic grouping structure  
127 where three of the four females are together on any given day, and the fourth is with two male

128 bonobos. These two males were not involved in this study because one male refuses to participate  
129 in any oxytocin experiments, and our aim was to test whole groups at a time with the same  
130 condition. Three of the females join the male bonobos with varying frequency, while the fourth  
131 (Lenore) is always with other female bonobos. Individuals thus had a varying number of trials, with  
132 Lenore having the most due to never joining the male group (24 trials), followed by Lolita (20  
133 trials), followed by Louise and Ikela (14 trials each) who are most often with the males. Transfers  
134 between groups typically occur in the evening and are kept consistent for at least one day and up  
135 to one week. The bonobos therefore had been in the same grouping structure for the whole day  
136 prior to the start of experiments.

137

138 Administration procedure:

139 Oxytocin administration procedures followed Brooks et al. [20]. Briefly, oxytocin was dissolved in  
140 saline at a concentration of 40IU/mL. The oxytocin solution or placebo control was nebulized into  
141 a box using a portable nebulizer (Omron NE-U100) at a minimum rate of 0.25mL/minute, for a  
142 cumulative 4 minutes while apes drank juice (thus a total of 40IU or more was nebulized during  
143 the administration period). We paused counting the time while apes' noses were outside the box.  
144 Participation to this administration was voluntary. Three of the bonobos could simultaneously  
145 participate in oxytocin administration in their typical enclosure, while the fourth (Ikela) preferred  
146 to move to another room to participate in the administration procedure. Thus, on days when Ikela  
147 was in the group, we first completed the administration procedure with Ikela (accompanied by  
148 other participant bonobos), and then returned her to the home enclosure with the other  
149 participant bonobos; the other participant bonobos were then administered oxytocin (or saline



150 placebo control). On days when Ikela was not in the group, all participants were administered  
151 oxytocin (or saline placebo) in their home enclosure. All group members received the same  
152 condition (saline placebo or oxytocin) on any given day of experiments and finished administration  
153 procedures within 30 minutes of one another.

154 One trial was performed in an experimental day. The order of conditions was pseudorandomized  
155 such that the same condition (placebo and oxytocin) never occurred more than twice in  
156 consecutive trials (experimental days) and that the same number of trials were conducted for  
157 placebo and oxytocin condition for each participant and for each grouping structure. We had a  
158 minimum of 2 days between trials to avoid any possible carryover effect of oxytocin. On each  
159 experimental day, the experiment was performed between 11:00 and 12:15, and the observation  
160 window therefore started between 11:30 and 12:45. Experimental days followed the same feeding  
161 schedule; bonobos were fed breakfast around 9:00, and additional greenery is available for  
162 foraging throughout the day. Experiments took place over five calendar months across two  
163 calendar years.

164

165 Observation procedure:

166 Observation began 30 minutes after completion of administration procedures to the last individual,  
167 and lasted for one hour. This window was chosen based on previous studies [8], where oxytocin's  
168 effect is typically measured in the window between 30 minutes and 2 hours after completion of  
169 administration procedures. In our experiment, the last individual to complete administration  
170 procedures was always within 30 minutes of the first individual to finish, and thus all participants

171 were observed for one hour, starting and finishing between 30 minutes and 2 hours following  
172 completion of administration procedures on any given day. We chose this window in order to  
173 maximize data collection within the active window of oxytocin while ensuring consistency  
174 between trials and participants, where observation windows were kept constant at 1 hour per trial  
175 and all data points for all individuals were within the 30 minutes to 2 hour window employed in  
176 previous studies.

177 Observation methods combined scan and event sampling. Specifically, every 2 minutes,  
178 interindividual proximity was estimated for each dyad into one of four categories; in contact,  
179 within arm's reach (one individual could extend their arm to touch the other), < 3 meters, and > 3  
180 meters. In addition, at the same 2 minute intervals, we coded each individual's behaviour  
181 (grooming - including direction and partner(s), resting, self-directed behaviour, moving, eating).  
182 Finally, we recorded all occurrences of play, GG-rubbing, abnormal behaviour (in this group  
183 primarily regurgitation and reingestion), and aggression towards groupmates (including displays).

184 We additionally recorded any agonistic or socio-sexual behaviour during the administration  
185 procedures and during the 30 minutes before the formal observation window to check if the  
186 presence of such interactions could account for our results. No agonistic behaviour was observed,  
187 and GG-rubbing occurred on 4 trials during administration procedure, on 2 trials before oxytocin  
188 condition and 2 trials before saline placebo condition.

189 Analysis

190 All analyses were conducted in R [27]. Behavioural scan data was analyzed with binomial GLMMs  
191 (Generalized Linear Mixed Models) with package lme4 [28], where each individual at each

192 sampling point was characterized as either engaged in (1) or not engaged in (0) a given behaviour.  
193 The model included a fixed effect of condition as a test effect and also fixed effects of time, the  
194 square of time (time<sup>2</sup>) and grouping structure (where a unique value was given for each possible  
195 combination of individuals) as control effects. The model also included random effects of  
196 participant and day (a factor with a unique value for each experimental day), as well as random  
197 slopes of each fixed effect for each random effect. Numeric effects were z-transformed to have a  
198 mean of 0 and the standard deviation of 1. Random slope structure was kept maximal, except that  
199 the interaction between random slopes and intercepts was removed due to issues with  
200 convergence [29]. The model structure was thus:  $\text{behaviour} \sim \text{condition} + \text{time} + \text{time}^2 + \text{group} + (1$   
201  $+ \text{group} + \text{condition} + \text{time} + \text{time}^2 \mid \mid \text{individual}) + (1 + \text{group} + \text{condition} + \text{time} + \text{time}^2 \mid \mid \text{day})$ .

202 For all GLMMs we checked model stability by comparing our models to those which  
203 excluded levels of the random effects one at a time. We additionally calculated odds ratio (OR)  
204 estimates and 95% confidence intervals for all significant effects. For the grooming data, we  
205 analyzed rates of active grooming (giving or mutual grooming) on the individual level, where  
206 receiving grooming was valued as 0 for not actively grooming another individual. Given  
207 considerable inter-individual variation observed by visual inspection of the data, we additionally  
208 tested each individual with the same model structure for significant effects (without the random  
209 effect of participant). We here used a significance threshold of 0.0125 (0.05/4) to correct for  
210 multiple testing at the individual level. Finally, we ran models excluding each level of participant to  
211 check the overall model stability.

212 Proximity data was analyzed using a CLMM (cumulative link mixed model) on ordinal data  
213 using the package “ordinal” [30]. Fixed and random effect structures were the same as those in

214 the behavioural scan data analysis, except for the individual participant variable was replaced by  
215 dyad (a unique value for each dyad), and the addition of two random effects to represent the two  
216 individuals within a dyad (randomly distributed as individual variable 1 and 2).

217 All occurrence data was analyzed with a binomial GLMM, where each individual for each  
218 day was characterized as having engaged in (1) or not engaged in (0) a given behaviour. The fixed  
219 and random effect structure was the same as in the scan behaviour models, except for the time  
220 variables were removed due to data being summarized across a given observation day. Model  
221 syntax for all model types can be found in supplemental material.

222 For all models, statistical significance of effects was calculated using a likelihood ratio test  
223 (using the “drop1” function in R).

224

225 Results

226 Our model with active grooming as response revealed a significant effect of condition (oxytocin,  
227 saline placebo;  $\beta = 1.16$ ,  $SE = 0.49$ ,  $\chi^2 = 5.47$ ,  $p = 0.019$ ,  $OR = 3.18$  (95% CI: 1.23, 8.23); Table 1,  
228 Figure 1). In our stability check analysis excluding each participant one-by-one in the model, the  
229 effect of oxytocin on grooming was significant in all models except for that excluding Louise  
230 (excluding Ikela:  $\beta = 0.79$ ,  $SE = 0.31$ ,  $\chi^2 = 5.27$ ,  $p = 0.022$ ; excluding Lenore:  $\beta = 1.28$ ,  $SE = 0.64$ ,  $\chi^2 =$   
231  $8.97$ ,  $p = 0.0027$ ; excluding Lolita:  $\beta = 0.88$ ,  $SE = 0.36$ ,  $\chi^2 = 5.06$ ,  $p = 0.025$ ; excluding Louise:  $\beta =$   
232  $0.59$ ,  $SE = 0.37$ ,  $\chi^2 = 2.34$ ,  $p = 0.13$ ). In our individual-level analysis of grooming, we found a  
233 significant effect of condition only for Louise using a significance threshold of 0.0125 (Ikela:  $\beta =$   
234  $0.86$ ,  $SE = 1.51$ ,  $\chi^2 = 0.24$ ,  $p = 0.63$ ; Lenore:  $\beta = 0.79$ ,  $SE = 0.35$ ,  $\chi^2 = 4.61$ ,  $p = 0.032$ ; Lolita: model  
235 could not run (as Lolita never actively groomed in our dataset); Louise:  $\beta = 1.15$ ,  $SE = 0.40$ ,  $\chi^2 =$   
236  $9.09$ ,  $p = 0.0026$ ).

237

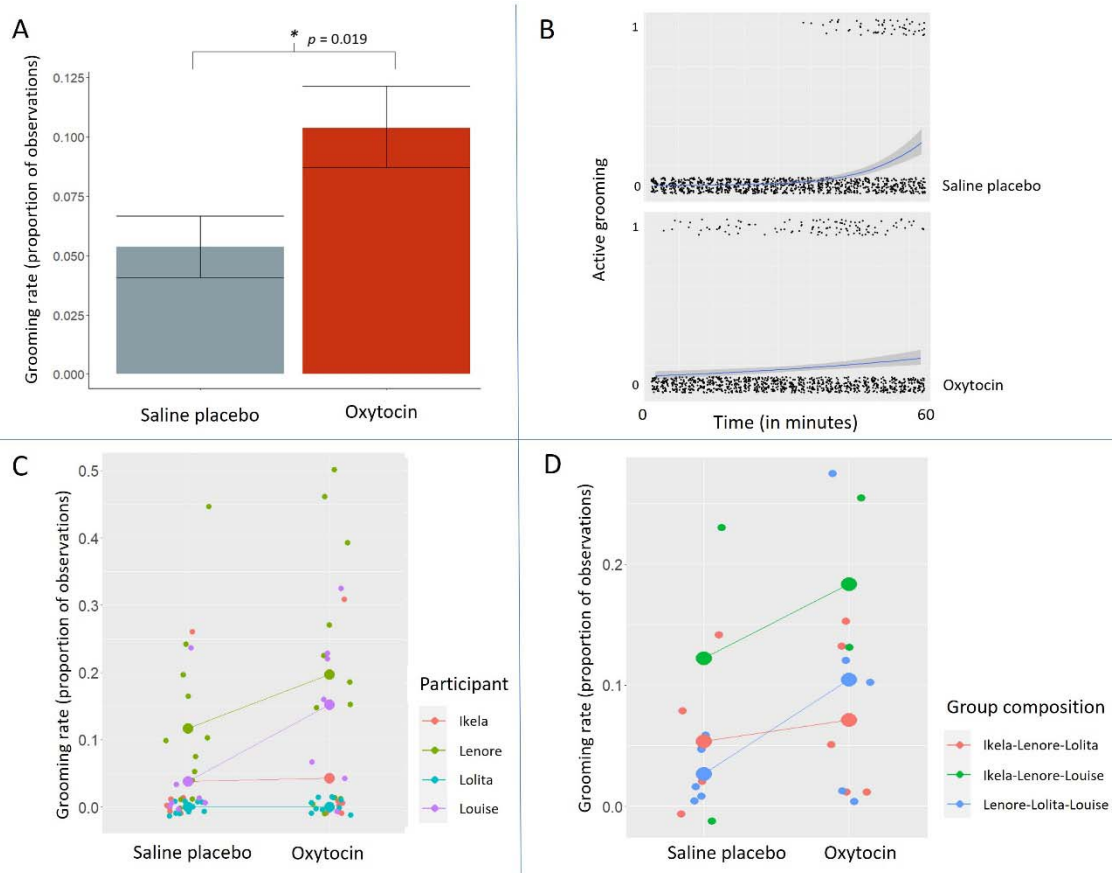

238

239 Figure 1: Rates of active (giving) grooming in the oxytocin and saline placebo conditions over the  
 240 observation window. A) Absolute rates of grooming across all trials and participants B) Time  
 241 course of grooming by condition, 1 represents giving grooming and 0 represents not giving  
 242 grooming C) Grooming rates by participant and condition (small circles represent grooming rates  
 243 by trial, large circles represent mean grooming rates across trials) D) Grooming rates by group  
 244 structure by condition (small circles represent grooming rates by trial, large circles represent mean  
 245 grooming rates across trials).

246

247 Table 1; Details of grooming and self-directed behaviour models with significant terms in bold.

| Response        | Term                | Estimate $\pm$ SE                  | $\chi^2$    | df       | p             |
|-----------------|---------------------|------------------------------------|-------------|----------|---------------|
| Active grooming | (Intercept)         | -15.57 $\pm$ 6.29                  |             |          |               |
|                 | Test predictors:    |                                    |             |          |               |
|                 | <b>Condition</b>    | <b>1.156 <math>\pm</math> 0.49</b> | <b>5.47</b> | <b>1</b> | <b>0.019*</b> |
|                 | Control predictors: |                                    |             |          |               |
|                 | <i>Group</i>        |                                    | <i>4.73</i> | <i>2</i> | <i>0.094.</i> |

|                         |                                       |                   |             |          |                |
|-------------------------|---------------------------------------|-------------------|-------------|----------|----------------|
|                         | <i>Ikela-Lenore-Louise</i>            | 12.61±6.29        |             |          |                |
|                         | <i>Lenore-Lolita-Louise</i>           | 8.14±6.70         |             |          |                |
|                         | <b>Time (time + time<sup>2</sup>)</b> | <b>1.59±0.44</b>  | <b>9.15</b> | <b>1</b> | <b>0.0025*</b> |
| Self-directed behaviour | (Intercept)                           | -2.81±0.60        |             |          |                |
|                         | Test predictors:                      |                   |             |          |                |
|                         | <b>Condition</b>                      | <b>-0.33±0.14</b> | <b>5.16</b> | <b>1</b> | <b>0.018*</b>  |
|                         | Control predictors:                   |                   |             |          |                |
|                         | Group                                 |                   | 3.09        | 2        | 0.21           |
|                         | Ikela/Lenore/Louise                   | -0.094±0.53       |             |          |                |
|                         | Lenore/Lolita/Louise                  | 0.75±0.53         |             |          |                |
|                         | <b>Time</b>                           | <b>-0.31±0.13</b> | <b>4.42</b> | <b>1</b> | <b>0.035*</b>  |

248

249

250 There was also a significant reduction in self-directed behaviour in the oxytocin compared to  
 251 placebo condition ( $\beta = -0.33$ , SE = 0.14,  $\chi^2 = 5.16$ ,  $p = 0.018$ , OR = 0.72 (95% CI: 0.54, 0.94); Table 1).

252 In our stability check analysis excluding each participant one-by-one in the model, the effect of

253 oxytocin on self-directed behaviour was significant in the model excluding Lenore and the model

254 excluding Lolita (excluding Ikela:  $\beta = -0.26$ , SE = 0.13,  $\chi^2 = 3.52$ ,  $p = 0.061$ ; excluding Lenore:  $\beta = -$

255 0.41, SE = 0.14,  $\chi^2 = 8.89$ ,  $p = 0.0029$ ; excluding Lolita:  $\beta = -0.51$ , SE = 0.16,  $\chi^2 = 9.81$ ,  $p = 0.0017$ ;

256 excluding Louise:  $\beta = -0.34$ , SE = 0.17,  $\chi^2 = 3.65$ ,  $p = 0.056$ ). In our individual-level analysis, we

257 found a significant effect only for Ikela using a significance threshold of 0.0125 (Ikela:  $\beta = -0.71$ , SE

258 = 0.21,  $\chi^2 = 12.19$ ,  $p = 0.00048$ ; Lenore:  $\beta = -0.15$ , SE = 0.28,  $\chi^2 = 0.27$ ,  $p = 0.60$ ; Lolita:  $\beta = -0.59$ , SE

259 = 0.24,  $\chi^2 = 5.58$ ,  $p = 0.018$ ; Louise:  $\beta = -0.58$ , SE = 0.41,  $\chi^2 = 2.48$ ,  $p = 0.11$ ).

260 There were no significant differences in interindividual proximity ( $\beta = -0.15$ ,  $\chi^2 = 0.32$ ,  $p = 0.57$ ),

261 frequency of the abnormal behaviour regurgitation and reingestion ( $\beta = -1.05$ , SE = 0.66,  $\chi^2 = 2.65$ ,

262  $p = 0.10$ ), or rate of rest ( $\beta = -0.10$ , SE = 0.18,  $\chi^2 = 0.34$ ,  $p = 0.56$ ) between the oxytocin and placebo

263 condition. Bonobos engaged in GG-rubbing only once (oxytocin condition) and displayed no  
264 aggression toward groupmates or any bouts of play during the observation period. See  
265 supplementary material Table S2 for full details of all models.

266



267 Discussion:

268 We found that the grooming rates of captive female bonobos were higher in the oxytocin  
269 compared to saline placebo condition, consistent with the predictions of the biobehavioural  
270 feedback loop hypothesis of oxytocin in bonobo social bonding. However, when conducting  
271 individual-level analyses this was only significant after correcting for multiple testing in one  
272 participant (Louise). There was no significant effect of oxytocin on inter-individual proximity,  
273 suggesting the increased rate of grooming is not merely a consequence of increased proximity.  
274 The bonobos also engaged in self-directed behaviour less in the oxytocin compared to placebo  
275 condition (though again this was significant on an individual level in just one participant - Ikela),  
276 which is potentially related to its anxiolytic effect, though it should be noted we did not distinguish  
277 between kinds of self-directed behaviours such as self-scratching or self-grooming which may have  
278 different relations to stress. The proportion of rest and frequency of regurgitation and reingestion  
279 did not differ between conditions, while GG-rubbing, play, and aggression were rarely or never  
280 observed during our 1-hour observation window, likely due to low overall tension, precluding  
281 formal analysis.

282         Despite our overall model showing an increase in grooming in the oxytocin condition, our  
283 individual-level analyses revealed only one individual, Louise, a 48-year-old female bonobo  
284 relatively dominant to other groupmates. Lenore, a 38-year-old, also groomed groupmates more  
285 in the oxytocin compared to the saline condition, but was not significant after correcting for  
286 multiple testing. Ikela, a 29-year-old, groomed slightly more, but this effect was also not significant.  
287 Lolita was never observed actively grooming throughout our experiment, and thus her rate of  
288 grooming was completely unchanged by oxytocin. Future studies are needed to examine what

289 factors drive these potential individual differences. It is also important to note that given social  
290 grooming necessarily requires a grooming partner, and given our experimental design  
291 administering the same condition to all group members simultaneously, oxytocin's effect on the  
292 group may not be entirely reducible to the individual level. Oxytocin may as a whole promote a  
293 group dynamic more conducive to grooming, which is measurable in the behaviour of certain key  
294 individuals. This possibility can be directly tested by administering oxytocin compared to saline  
295 placebo only to Louise, and always saline placebo to others, and examining if the same effect is  
296 found.

297         Although we addressed some previous methodological issues, there are several important  
298 limitations in this study. Due to limited possibility of testing, enclosures suitable for detailed  
299 observation, and some apes' willingness to join experiments, the sample was limited to four adult  
300 female bonobos. Moreover, previous work has indicated sex-specific effects of oxytocin [31–33],  
301 and thus it remains unclear whether our results can be generalized to different sex pairs, though it  
302 should be noted that Crockford et al. [1] did not find significant differences between female-  
303 female, female-male, and male-male dyads in urinary oxytocin level following grooming in wild  
304 chimpanzees. We also could not investigate the possible effect of different dominance rank,  
305 rearing history, age, or genetic background contributing to differences in the amount of change  
306 between conditions across individuals, which should be directly explored in the future. Moreover,  
307 the small number of participants did not enable us to test the effect of existing social bond  
308 strength and relatedness among groupmates, which may interact with the observed increase in  
309 grooming.

310           Finally, while we found an effect of oxytocin on rates of social grooming at least in some  
311 individuals, we did not find any effect on rates of GG-rubbing. An increase in urinary oxytocin  
312 following GG-rubbing was reported by Moscovice et al.'s [2]. We observed GG-rubbing just once in  
313 the experiment's observation window. GG-rubbing is typically infrequent in our study group of  
314 bonobos, particularly under normal conditions in their home environment as in our main  
315 observational window. Floor effects may thus be responsible for the lack of an effect, and future  
316 studies focused on contexts where GG-rubbing is more likely to occur (e.g., feeding, reunions) will  
317 be necessary to determine whether or not oxytocin increases propensity to engage in GG-rubbing  
318 in female bonobos.

319           In conclusion, we found that exogenous oxytocin promotes social grooming in at least  
320 some female bonobos when administered to the whole group. Although much future work is  
321 necessary, our results demonstrate that oxytocin does affect a socio-positive behavior of a *Pan*  
322 species during spontaneous, naturalistic social interactions, filling some gap between both  
323 previous field studies on ape urinary oxytocin and experimental administration studies on non-ape  
324 species. Moreover, although limited, our finding offers some experimental evidence for the  
325 biobehavioural feedback loop hypothesis for oxytocin in bonobo social bonding when combined  
326 with previous research showing increased urinary oxytocin in bonobos and chimpanzees following  
327 socio-positive interaction [1,2] (note also that while peripheral measures such as urinary  
328 measurement allow non-invasive data on primates, central oxytocin release following specific  
329 social behaviours has also been found in rodents [34]). Future work should test a larger number of  
330 individuals to test potential differences in oxytocin's effect between species, should examine inter-  
331 individual variation with respect to social closeness and centrality, and should study how social

332 contexts such as feeding tension interact with this effect. Our results, at minimum, demonstrate  
333 that oxytocin can affect socio-positive behaviour in at least some bonobo individuals during  
334 natural social interactions, adding to accumulating evidence on its importance to *Pan* sociality.

335

336

337 Acknowledgements:

338 We thank the bonobos at Kumamoto Sanctuary for participating in this study. We also thank  
339 Etsuko Nogami and the other caretakers at Kumamoto Sanctuary for their support throughout this  
340 project, Dr. Satoshi Hirata for his advice and support, and Dr. Yutaro Sato for helping in data  
341 collection. This study was funded by Japan Society for the Promotion of Science (KAKENHI  
342 #21J21123 to J.B., #19H01772 and #20H05000 to F.K., and #19H00629, #22H05653, and  
343 #22H04451 to S.Y.)

344 References:

- 345 1. Crockford C, Wittig RM, Langergraber K, Ziegler TE, Zuberbühler K, Deschner T: **Urinary**  
346 **oxytocin and social bonding in related and unrelated wild chimpanzees.** *Proceedings of the*  
347 *Royal Society B: Biological Sciences* 2013, **280**:20122765.
- 348 2. Moscovice LR, Surbeck M, Fruth B, Hohmann G, Jaeggi A V., Deschner T: **The cooperative**  
349 **sex: Sexual interactions among female bonobos are linked to increases in oxytocin,**  
350 **proximity and coalitions.** *Hormones and Behavior* 2019, **116**:104581.
- 351 3. Wittig RM, Crockford C, Deschner T, Langergraber KE, Ziegler TE, Zuberbühler K: **Food**  
352 **sharing is linked to urinary oxytocin levels and bonding in related and unrelated wild**  
353 **chimpanzees.** *Proceedings of the Royal Society B: Biological Sciences* 2014, **281**:20133096.
- 354 4. Preis A, Samuni L, Mielke A, Deschner T, Crockford C, Wittig RM: **Urinary oxytocin levels in**  
355 **relation to post-conflict affiliations in wild male chimpanzees (*Pan troglodytes verus*).**  
356 *Hormones and Behavior* 2018, **105**:28–40.
- 357 5. Samuni L, Preis A, Mundry R, Deschner T, Crockford C, Wittig RM: **Oxytocin reactivity during**  
358 **intergroup conflict in wild chimpanzees.** *Proceedings of the National Academy of Sciences*  
359 2017, **114**:268–273.
- 360 6. Samuni L, Preis A, Deschner T, Wittig RM, Crockford C: **Cortisol and oxytocin show**  
361 **independent activity during chimpanzee intergroup conflict.** *Psychoneuroendocrinology*  
362 2019, **104**:165–173.
- 363 7. Samuni L, Preis A, Deschner T, Crockford C, Wittig RM: **Reward of labor coordination and**  
364 **hunting success in wild chimpanzees.** *Communications Biology* 2018, **1**:138.
- 365 8. Bauman MD, Murai T, Hogrefe CE, Platt ML: **Opportunities and challenges for intranasal**  
366 **oxytocin treatment studies in nonhuman primates.** *American Journal of Primatology* 2018,  
367 **80**:1–8.
- 368 9. Dal Monte O, Noble PL, Costa VD, Averbeck BB: **Oxytocin enhances attention to the eye**  
369 **region in rhesus monkeys.** *Front Neurosci* 2014, **8**:41.
- 370 10. Parr LA, Modi M, Siebert E, Young LJ, Rd G: **Intranasal oxytocin selectively attenuates rhesus**  
371 **monkeys' attention to negative facial expressions.** *Psychoneuroendocrinology* 2013,  
372 doi:10.1016/j.psyneuen.2013.02.011.
- 373 11. Ebitz RB, Watson KK, Platt ML: **Oxytocin blunts social vigilance in the rhesus macaque.**  
374 *Proceedings of the National Academy of Sciences* 2013, **110**:11630–11635.
- 375 12. Putnam PT, Roman JM, Zimmerman PE, Gothard KM: **Oxytocin enhances gaze-following**  
376 **responses to videos of natural social behavior in adult male rhesus monkeys.**  
377 *Psychoneuroendocrinology* 2016, **72**:47–53.

- 378 13. Jiang Y, Platt ML: **Oxytocin and vasopressin flatten dominance hierarchy and enhance**  
379 **behavioral synchrony in part via anterior cingulate cortex.** *Scientific Reports* 2018, **8**:1–14.
- 380 14. Kotani M, Shimono K, Yoneyama T, Nakako T, Matsumoto K, Ogi Y, Konoike N, Nakamura K,  
381 Ikeda K: **An eye tracking system for monitoring face scanning patterns reveals the**  
382 **enhancing effect of oxytocin on eye contact in common marmosets.**  
383 *Psychoneuroendocrinology* 2017, **83**:42–48.
- 384 15. Cavanaugh J, Carp SB, Rock CM, French JA: **Oxytocin modulates behavioral and**  
385 **physiological responses to a stressor in marmoset monkeys.** *Psychoneuroendocrinology*  
386 2016, **66**:22–30.
- 387 16. Smith AS, Ågmo A, Birnie AK, French JA: **Manipulation of the oxytocin system alters social**  
388 **behavior and attraction in pair-bonding primates, *Callithrix penicillata*.** *Hormones and*  
389 *Behavior* 2010, **57**:255–262.
- 390 17. Brosnan SF, Talbot CF, Essler JL, Leverett K, Flemming T, Dougall P, Heyler C, Zak PJ: **Oxytocin**  
391 **reduces food sharing in capuchin monkeys by modulating social distance.** *Behaviour* 2015,  
392 **152**:941–961.
- 393 18. Proctor D, Calcutt SESE, Burke K, de Waal FBMFBM: **Intranasal Oxytocin Failed to Affect**  
394 **Chimpanzee (*Pan troglodytes*) Social Behavior.** *Animal behaviour and cognition* 2016,  
395 **3**:150–158.
- 396 19. Hall K, Smith M, Russell JL, Lambeth SP, Schapiro SJ, Brosnan SF: **Chimpanzees Rarely Settle**  
397 **on Consistent Patterns of Play in the Hawk Dove, Assurance, and Prisoner’s Dilemma**  
398 **Games, in a Token Exchange Task.** *Animal behavior and cognition* 2019, **6**:48–70.
- 399 20. Brooks J, Kano F, Sato Y, Yeow H, Morimura N, Nagasawa M, Kikusui T, Yamamoto S:  
400 **Divergent effects of oxytocin on eye contact in bonobos and chimpanzees.**  
401 *Psychoneuroendocrinology* 2021, **125**:105119.
- 402 21. Nagasawa M, Okabe S, Mogi K, Kikusui T: **Oxytocin and mutual communication in mother-**  
403 **infant bonding.** *Frontiers in Human Neuroscience* 2012, **6**:31.
- 404 22. Rilling JK, Young LJ: **The biology of mammalian parenting and its effect on offspring social**  
405 **development.** *Science* 2014, **345**:771–776.
- 406 23. Da Costa APC, Guevara-Guzman RG, Ohkura S, Goode JA, Kendrick KM: **The Role of Oxytocin**  
407 **Release in the Paraventricular Nucleus in the Control of Maternal Behaviour in the Sheep.**  
408 *Journal of Neuroendocrinology* 1996, **8**:163–177.
- 409 24. Insel TR, Young LJ: **The neurobiology of attachment.** *Nature Reviews Neuroscience* 2001,  
410 **2**:129–136.

- 411 25. Nagasawa M, Ogawa M, Mogi K, Kikusui T: **Intranasal Oxytocin Treatment Increases Eye-**  
412 **Gaze Behavior toward the Owner in Ancient Japanese Dog Breeds.** *Frontiers in Psychology*  
413 2017, **8**:1624.
- 414 26. Nagasawa M, Mitsui S, En S, Ohtani N, Ohta M, Sakuma Y, Onaka T, Mogi K, Kikusui T:  
415 **Oxytocin-gaze positive loop and the coevolution of human-dog bonds.** *Science* 2015,  
416 **348**:333–336.
- 417 27. R Core Team: **R: A Language and Environment for Statistical Computing.** *R Foundation for*  
418 *Statistical Computing* 2019,
- 419 28. Bates D, Mächler M, Bolker B, Walker S: **Fitting Linear Mixed-Effects Models Using {lme4}.**  
420 *Journal of Statistical Software* 2015, **67**:1–48.
- 421 29. Barr DJ, Levy R, Scheepers C, Tily HJ: **Random effects structure for confirmatory hypothesis**  
422 **testing: Keep it maximal.** *Journal of Memory and Language* 2013, **68**:255–278.
- 423 30. Christensen RHB: **ordinal: Regression Models for Ordinal Data.** 2019,
- 424 31. Gao S, Becker B, Luo L, Geng Y, Zhao W, Yin Y, Hu J, Gao Z, Gong Q, Hurlemann R, et al.:  
425 **Oxytocin, the peptide that bonds the sexes also divides them.** *Proceedings of the National*  
426 *Academy of Sciences of the United States of America* 2016, **113**:7650–4.
- 427 32. Caldwell HK: **Oxytocin and sex differences in behavior.** *Current Opinion in Behavioral*  
428 *Sciences* 2018, **23**:13–20.
- 429 33. Dumais KM, Bredewold R, Mayer TE, Veenema AH: **Sex differences in oxytocin receptor**  
430 **binding in forebrain regions: Correlations with social interest in brain region- and sex-**  
431 **specific ways.** *Hormones and Behavior* 2013, **64**:693–701.
- 432 34. Neumann ID, Landgraf R: **Balance of brain oxytocin and vasopressin: implications for**  
433 **anxiety, depression, and social behaviors.** *Trends in Neurosciences* 2012, **35**:649–659.
- 434
